# Supplementary material
Source: publisher site journal article supplement (https://www.dovepress.com/article/308397)
Supplement: Supplementary file 1 [file get_supplementary_file.php]

**Identifying Patterns of Turnover Intention Among Alabama Frontline Nurses in Hospital Settings During the COVID-19 Pandemic**

**Appendix 1: Questionnaire Instrument items**

| **Disclaimer** | Study title: Identifying Patterns of Turnover Intention Among Alabama Frontline Nurses in Hospital Settings During the COVID-19 Pandemic  COVID-19 is a highly contagious airborne virus that appeared in the US in January. The Centers for disease control recommend social distancing and face masks (KN95 and N95) to limit the spread of infection. The following survey will ask you questions related to your experience working with patients infected with COVID-19.    This is a survey study of front-line nurses working in HOSPITAL settings. This survey is being conducted to investigate and help us understand the significant sources of stressors nurses face during the COVID-19 pandemic and explore the coping strategies employed by the nursing staff to overcome this stress. This survey should take approximately 10 minutes to complete, and your participation is voluntary. If you decided to fill out the survey, you could choose to provide an address to receive a $20 gift card, to provide VENMO ID for cash compensation, or to donate the amount to a food bank. No identifiable information will be collected- If you decided to be compensated, your information will be kept confidential and will be directly deleted from the system immediately after transferring the compensation.    If you have questions about this study, you may contact the study's lead investigator, Astin Cole, PhD student at Auburn University Health Services Administration. He can be reached at 256-361-3589 or via email: abc0074@auburn.edu.    As a research participant, if you have questions about your rights, you may contact to the Auburn University, Office of Research Compliance, or the Institutional Review Board by phone (334)-844-5966 or email at IRBadmin@auburn.edu or IRBChair@auburn.edu. |
| --- | --- |
| **Demographic Factors** | **Marital Status: (1) Married (2) Divorced (3) Single - never married** |
| **Parental Status (1) No (2) Yes** |
| **Seniority (1) Beginner (less than 5 years of job experience) (2) Intermediate (6-10 years of job experience) (3) Advanced (over 10 years of job experience)** |
| **Specialty: (1) Head nurse, (2) general nurse, (3) ICU, (4) OR, (5) ER, (6) Other: Please specify** |
| **Shift type: (1) Day shift (primarily); (2) Night shift (primarily)** |
| **Please provide your age** |
| **Please provide your chosen gender (1) M (2) Female** |
| **Ethnicity:** (1) White, (2) Black or African American, (3) American Indian or Alaskan Native, Asian, Native Hawaiian or Pacific Islander, Hispanic, Other, please specify: |
| **Turnover Intention** | **Questions** |
|  | **Please describe your feelings during this crisis – (1) Strongly Agree, (2) Agree, (3) Neither Agree nor Disagree, (4) Agree, (5) Strongly Agree** |
|  | I have thought about leaving my job in the last three months. |
|  | I think about leaving my job more as the infection rate increases. |
| **Job-Demand Stressors** | **Questions** |
| **Patient Acuity** | **Please describe your feelings during this crisis – (1) Strongly Agree, (2) Agree, (3) Neither Agree nor Disagree, (4) Agree, (5) Strongly Agree** |
|  | I am worried about my infected patients getting worse or dying in front of me. |
|  | I am worried about communication with my patients and their families. |
|  | I am worried about my ability to provide the best care to my patients. |
| **Task (Patient) Assignment** | **Please describe your feelings during this crisis – (1) Strongly Agree, (2) Agree, (3) Neither Agree nor Disagree, (4) Agree, (5) Strongly Agree** |
|  | I am worried that I will have to take care of my infected colleagues. |
|  | I am worried about receiving additional infected patients or suspected cases. |
|  | I am worried about being assigned to a front-line job with COVID-19 patients. |
| **Regulations** | **Please describe your feelings during this crisis – (1) Strongly Agree, (2) Agree, (3) Neither Agree nor Disagree, (4) Agree, (5) Strongly Agree** |
|  | I am worried about the constant changes to regulations related to COVID-19. |
|  | I am worried about being constantly screened for infection. |
|  | I am worried about a lack of guidance on how to deal with COVID-19 patients. |
|  | I am worried about keeping a face mask on for an extended period. |
|  | I am worried about the lack of specific treatment for COVID-19. |
| **Health Risk Factor** | **Please describe your feelings during this crisis – (1) Strongly Agree, (2) Agree, (3) Neither Agree nor Disagree, (4) Agree, (5) Strongly Agree** |
|  | I am worried about my stress levels as a health factor. |
|  | I often think of calling in sick. |
|  | I feel more stress now than I did before the COVID-19 pandemic. |
| **Organizational Resources** | **Questions** |
| **PPE** | **Please describe your feelings during this crisis – (1) Strongly Agree, (2) Agree, (3) Neither Agree nor Disagree, (4) Agree, (5) Strongly Agree** |
|  | I get worried when I hear about PPE shortages. |
|  | I get worried when I hear about ventilator shortages. |
|  | I get worried when I hear about face mask shortages. |
| **Compensation** | **Please describe your feelings during this crisis – (1) Strongly Agree, (2) Agree, (3) Neither Agree nor Disagree, (4) Agree, (5) Strongly Agree** |
|  | In the last three months, to what degree have you felt your workload during the pandemic warranted an increase in compensation or a monetary reward? |
| **Psychosocial Support** | **Please describe your feelings during this crisis – (1) Strongly Agree, (2) Agree, (3) Neither Agree nor Disagree, (4) Agree, (5) Strongly Agree** |
|  | I feel I would benefit from psychological care. |
|  | I feel I would benefit from grief counseling. |
|  | I feel I would benefit from counseling for trauma. |
|  | I feel I would benefit from family counseling. |
|  | I am worried about a lack of psychological support for patients. |
| **Supervisor Support** | **Please describe your feelings during this crisis – (1) Strongly Agree, (2) Agree, (3) Neither Agree nor Disagree, (4) Agree, (5) Strongly Agree** |
|  | My supervisor cares about my opinions. |
|  | My supervisor cares about my well-being. |
|  | My supervisor strongly considers my goals and values. |
|  | My supervisor shows very little concerns for me. |

| **Supplementary Table S1:** **List of Survey Items and Mean Scores** | | | |
| --- | --- | --- | --- |
| **Domain** | **Item** | **Mean** | **Std** |
| **Turnover Intention** | I have thought about leaving my job in the last three months. | 2.53 | 1.56 |
|  | I think about leaving my job more as the infection rate increases | 2.68 | 1.49 |
|  | | | |
| **Stress Related to Patient Acuity** | I am worried about my infected patients getting worse or dying in front of me. | 3.44 | 1.02 |
|  | I am worried about communication with my patients and their families. | 3.17 | 1.21 |
|  | I am worried about my ability to provide the best care to my patients. | 3.26 | 1.18 |
|  |  | 3.29 | 0.92 |
| **Personal Health Risk** | I am worried about my stress levels as a health factor. | 3.66 | 1.27 |
|  | I often think of calling in sick. | 2.24 | 1.47 |
|  | I feel more stress now than I did before the COVID-19 pandemic. | 4.01 | 1.12 |
|  | | | |
| **Patient Assignment** | I am worried that I will have to take care of my infected colleagues. | 3.04 | 1.15 |
|  | I am worried about receiving additional infected patients or suspected cases. | 3.55 | 1.07 |
|  | I am worried about being assigned to a front-line job with COVID-19 patients. | 3.33 | 1.37 |
|  | | | |
| **Regulation** | I am worried about the lack of specific treatment for COVID-19. | 3.86 | 1.29 |
|  | I am worried about a lack of guidance on how to deal with COVID-19 patients. | 3.59 | 1.16 |
|  | I am worried about the constant changes to regulations related to COVID-19. | 3.80 | 1.02 |
|  | I am worried about keeping a face mask on for a long period of time. | 3.53 | 1.26 |
|  | I am worried about being constantly screened for infection. | 3.09 | 1.07 |
|  | | | |
| **Personal Protective Equipment and Medical Equipment** | I get worried when I hear about PPE shortages. | 3.92 | 1.05 |
|  | I get worried when I hear about ventilators shortages. | 3.42 | 1.12 |
|  | I get worried when I hear about face mask shortages. | 3.95 | 1.12 |
|  | | | |
| **Psychosocial Support** | I feel I would benefit from psychological care. | 2.96 | 1.30 |
|  | I feel I would benefit from grief counseling. | 2.43 | 1.08 |
|  | I feel I would benefit from counseling for trauma. | 2.50 | 1.22 |
|  | I feel I would benefit from family counseling. | 2.12 | 0.90 |
|  | I am worried about a lack of psychological support for patients. | 3.80 | 0.97 |
|  | | | |
| **Supervisor support** | My supervisor cares about my opinions. | 2.40 | 1.15 |
|  | My supervisor cares about my well-being. | 2.39 | 1.01 |
|  | My supervisor strongly considers my goals and values. | 2.51 | 1.09 |
|  | My supervisor shows very little concerns for me. | 3.52 | 1.18 |
|  | | | |
| **Compensation** | Compensation- I feel that my workload during the pandemic warranted an increase in compensation. | 4.28 | 1.16 |
| 1= Strongly Disagree; 2= Disagree; 3 = Neither Agree nor Disagree; 4 = Agree; 5 = Strongly Agree | | | |
